# Supplementary material for: Preoperative Oral Carbohydrate (CHO) Supplementation Is Beneficial for Clinical and Biochemical Outcomes in Patients Undergoing Elective Cesarean Delivery under Spinal Anaesthesia—A Randomized Controlled Trial
Source: MDPI journal article supplement (doi:10.3390/jcm12154978), 2023-07-28
Supplement: s1 [file s1]

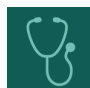

**Table S1.** Factors predisposing to PONV (based on the Apfel scale).

|                                                               |     | Group I – CHO (n=75) |             | Group II - SF (n=73) |             | p-value |
|---------------------------------------------------------------|-----|----------------------|-------------|----------------------|-------------|---------|
| Smoking in pregnancy, n (%)                                   | No  | 73                   | (97.33%)    | 67                   | (91.78%)    | 0.259   |
|                                                               | Yes | 2                    | (2.67%)     | 6                    | (8.22%)     |         |
| Previous PONV, n (%)                                          | No  | 61                   | (81.33%)    | 56                   | (76.71%)    | 0.625   |
|                                                               | Yes | 14                   | (18.67%)    | 17                   | (23.29%)    |         |
| Motion sickness, n (%)                                        | No  | 40                   | (53.33%)    | 38                   | (52.05%)    | 0.993   |
|                                                               | Yes | 35                   | (46.67%)    | 35                   | (47.95%)    |         |
| Nausea and vomiting in early pregnancy, n (%)                 | No  | 37                   | (49.33%)    | 30                   | (41.10%)    | 0.400   |
|                                                               | Yes | 38                   | (50.67%)    | 43                   | (58.90%)    |         |
| Nausea and vomiting in early pregnancy (0-10 scale) Me, Q1-Q3 |     | 2.00                 | 0.00 – 6.00 | 4.00                 | 0.00 – 6.00 | 0.432   |

Legend: CHO – oral carbohydrate drink, Me – median, Q1 – first quartile, Q3 – third quartile, n – number of patients, PONV – postoperative nausea and vomiting, SF – Standard fasting.

**Table S2.** Changes in mean arterial pressure (MAP) during cesarean delivery.

| Blood pressure parameters   | Group I – CHO (n=75) |       | Group II - SF (n=73) |       | p-value |
|-----------------------------|----------------------|-------|----------------------|-------|---------|
|                             | Mean                 | SD    | Mean                 | SD    |         |
| MAP (T0) - MAP (T1) [%]     | -7.47                | 17.69 | -3.52                | 11.13 | 0.106   |
| MAP (T0) - MAP (T4) [%]     | -23.52               | 15.72 | -22.90               | 15.16 | 0.805   |
| MAP (T0) - MAP (T7) [%]     | -23.34               | 13.69 | -18.36               | 17.25 | 0.050   |
| MAP (T0) - MAP (Tfinal) [%] | -16.67               | 10.88 | -17.85               | 9.72  | 0.489   |

Legend: CHO – oral carbohydrate drink, MAP – mean arterial pressure, n – number of patients, SD – standard deviation, SF – Standard fasting.

**Table S3.** Biochemical parameters for mother and neonate.

| Parameters                    | Group I – CHO (n=75) |        | Group II - SF (n=73) |        |         |
|-------------------------------|----------------------|--------|----------------------|--------|---------|
|                               | Mean                 | SD     | Mean                 | SD     | p-value |
| <b>Mother - plasma</b>        |                      |        |                      |        |         |
| pH                            | 7.44                 | 0.03   | 7.43                 | 0.03   | 0.001   |
| Glucose (mg/dl)               | 93.07                | 21.71  | 77.59                | 8.41   | <0.001  |
| Lactate (mmol/l)              | 1.62                 | 0.49   | 1.21                 | 0.46   | <0.001  |
| Plasma F2-isoPs [pg/ml]       | 40.15                | 16.89  | 43.78                | 14.91  | 0.049   |
| Beta-Hydroxybutyrate (mmol/l) | 1.74                 | 0.28   | 1.67                 | 0.21   | 0.144   |
| HOMA-IR                       | 10.45                | 8.94   | 2.19                 | 1.15   | <0.001  |
| <b>Mother - urine</b>         |                      |        |                      |        |         |
| Urine F2-isoPs [pg/ml]        | 615.42               | 115.11 | 649.97               | 121.41 | 0.018   |
| Creatinine urine [mg/ml]      | 0.36                 | 0.12   | 0.34                 | 0.09   | 0.237   |

|                                                     |         |        |         |        |       |
|-----------------------------------------------------|---------|--------|---------|--------|-------|
| Urine F2-isoPs/ Creatinine Ratio [pg/mg creatinine] | 1896.12 | 797.12 | 2073.46 | 701.84 | 0.045 |
| <b>Neonate – umbilical cord</b>                     |         |        |         |        |       |
| pH                                                  | 7.33    | 0.05   | 7.33    | 0.05   | 0.934 |
| Glucose (mg/dl)                                     | 52.10   | 10.45  | 55.76   | 8.23   | 0.007 |
| Lactate (mmol/l)                                    | 1.73    | 0.70   | 1.70    | 0.80   | 0.825 |

**Legend:** CHO – oral carbohydrate drink, n – number of patients, F2-isoPs – F2-isoprostanes, HOMA-IR – insulin resistance, Q1 – first quartile, Q3 – third quartile, SF – Standard fasting.

**Table S4.** Patient satisfaction data.

| Patient Satisfaction                                   | Group I – CHO (n=75) |               | Group II - SF (n=73) |               | p      |
|--------------------------------------------------------|----------------------|---------------|----------------------|---------------|--------|
| Feeling of hunger before CD, mean±SD; Me               | 2.00                 | 0.00 – 4.00   | 5.00                 | 3.00 – 7.00   | <0.001 |
| Feeling of thirst before CD, mean±SD; Me               | 5.00                 | 2.00 – 7.00   | 7.00                 | 6.00 – 9.00   | <0.001 |
| Feeling of hunger 6 hours after CD, mean±SD; Me        | 3.00                 | 2.00 – 5.00   | 5.00                 | 3.00 – 6.00   | 0.089  |
| Feeling of thirst 6 hours after CD, mean±SD; Me        | 6.00                 | 3.00 – 8.00   | 7.00                 | 4.00 – 10.00  | 0.059  |
| Satisfaction from taking part in this RCT, mean±SD; Me | 10.00.               | 10.00 – 10.00 | 10.00                | 10.00 – 10.00 | 0.886  |

All evaluations were based on a numeric rating scale from 0 to 10 points.

Legend: CHO – oral carbohydrate drink, CD – cesarean delivery, n – number of patients, Me – median, Q1 – first quartile, Q3 – third quartile, SF – Standard fasting.
